# Supplementary material for: miR‐200a/b/‐429 downregulation is a candidate biomarker of tumor radioresistance and independent of hypoxia in locally advanced cervical cancer
Source: PubMed Central journal article supplement (PMC8936520; doi:10.1002/1878-0261.13184), 2022-02-15
Supplement: MOL2-16-1402-s003.pdf [file MOL2-16-1402-s003.pdf]

Supplementary Tables S1-S3 for

## **miR-200a/b-429 downregulation is a candidate biomarker of tumor radioresistance and independent of hypoxia in locally advanced cervical cancer**

Anja Nilsen<sup>1\*</sup>, Tiril Hillestad<sup>2</sup>, Vilde E. Skingen<sup>1</sup>, Eva-Katrine Aarnes<sup>1</sup>, Christina S. Fjeldbo<sup>1</sup>, Tord Hompland<sup>1,2</sup>, Tina Sandø Evensen<sup>2</sup>, Trond Stokke<sup>2</sup>, Gunnar B. Kristensen<sup>3,4</sup>, Beata Grallert<sup>1</sup> and Heidi Lyng<sup>1,5\*</sup>

<sup>1</sup>Department of Radiation Biology, Norwegian Radium Hospital, Oslo University Hospital, Oslo, Norway.

<sup>2</sup>Department of Core Facilities, Norwegian Radium Hospital, Oslo University Hospital, Oslo, Norway.

<sup>3</sup>Department of Gynecological Oncology, Norwegian Radium Hospital, Oslo University Hospital, Oslo, Norway.

<sup>4</sup>Institute of Cancer Genetics and Informatics, Oslo University Hospital, Oslo, Norway, <sup>5</sup>Department of Physics, University of Oslo, Oslo, Norway.

\*Corresponding Authors:

**Heidi Lyng**, Department of Radiation Biology, Norwegian Radium Hospital, Oslo University Hospital, Pb 4950 Nydalen, Oslo 0424, Norway. Phone: 472-293-1478; E-mail: heidi.lyng@rr-research.no

**Anja Nilsen**, Department of Radiation Biology, Norwegian Radium Hospital, Oslo University Hospital, Pb 4950 Nydalen, Oslo 0424, Norway. Phone: 472-278-1463; E-mail: anja.nilsen@rr-research.no

**Supplementary Table S1.** Patient characteristics

| Characteristics                        | miRNA explorative cohort (n=90)     |    | miRNA validation cohort 1 (n=110)   |    | miRNA validation cohort 2 (n=79)* |    | p-value <sup>g</sup>   |
|----------------------------------------|-------------------------------------|----|-------------------------------------|----|-----------------------------------|----|------------------------|
|                                        | No                                  | %  | No                                  | %  | No                                | %  |                        |
| Age, years                             |                                     |    |                                     |    |                                   |    | 6.7x10 <sup>-2</sup>   |
| Median                                 | 52.9                                |    | 54.9                                |    | 48                                |    |                        |
| Range                                  | 21.8-83.9                           |    | 23.8-84.2                           |    | 26-84                             |    |                        |
| FIGO stage                             |                                     |    |                                     |    |                                   |    | 2.9x10 <sup>-1</sup>   |
| 1b -2b                                 | 70                                  | 78 | 76                                  | 69 | 61                                | 77 |                        |
| 3b-4a                                  | 20                                  | 22 | 34                                  | 31 | 18                                | 23 |                        |
| Tumor size (median)                    |                                     |    |                                     |    |                                   |    |                        |
| Volume (range) <sup>a</sup>            | 26.8 cm <sup>3</sup><br>(2.8-266.8) |    | 43.8 cm <sup>3</sup><br>(1.9-302.4) |    |                                   |    | 3.1x10 <sup>-3</sup>   |
| Diameter (range)                       |                                     |    |                                     |    | 5cm (2.3-8)                       |    |                        |
| NA                                     | 6                                   | 7  | 5                                   | 5  |                                   |    |                        |
| Lymph node status <sup>b</sup>         |                                     |    |                                     |    |                                   |    | 4.5x10 <sup>-1</sup>   |
| Positive                               | 44                                  | 49 | 45                                  | 41 | 39                                | 49 |                        |
| Negative                               | 46                                  | 51 | 65                                  | 59 | 40                                | 51 |                        |
| Concurrent cisplatin                   |                                     |    |                                     |    |                                   |    | 5.5x10 <sup>-1</sup>   |
| Yes (median no. of courses)            | 74 (5)                              | 82 | 90 (5)                              | 82 | NA                                |    |                        |
| No                                     | 16                                  | 18 | 20                                  | 18 | NA                                |    |                        |
| Hypoxia status <sup>c</sup>            |                                     |    |                                     |    |                                   |    | 7.5x10 <sup>-2</sup>   |
| Less hypoxic                           | 63                                  | 71 | 64                                  | 58 | NA                                |    |                        |
| More hypoxic                           | 26                                  | 29 | 46                                  | 42 | NA                                |    |                        |
| Observation time (months) <sup>d</sup> |                                     |    |                                     |    |                                   |    | 1.08x10 <sup>-11</sup> |
| Median                                 | 43                                  |    | 60                                  |    | 60                                |    |                        |
| Range                                  | 22-60                               |    | 28-60                               |    | 9-60                              |    |                        |
| Status                                 |                                     |    |                                     |    |                                   |    |                        |
| PFS <sup>e</sup>                       | 19                                  | 21 | 34 <sup>f</sup>                     | 31 | 26                                | 32 | 1.8x10 <sup>-1</sup>   |
| Central pelvic recurrence              | 5                                   | 6  | 8                                   | 7  | NA                                |    | 7.8x10 <sup>-1</sup>   |
| Lateral pelvic recurrence              | 4                                   | 4  | 8                                   | 7  | NA                                |    | 5.6x10 <sup>-1</sup>   |
| Distal recurrence<br>(metastasis)      | 11                                  | 12 | 25                                  | 23 | NA                                |    | 9.4x10 <sup>-2</sup>   |

FIGO, Federation International de Gynecologie et d'Obstetrique

<sup>a</sup> Calculated based on 3 orthogonal diameters (a,b,c) as  $(\pi/6)abc$ <sup>b</sup> Detected by MRI or CT at diagnosis, according to the response evaluation criteria in solid tumors (RECIST) v 1.1<sup>c</sup> The tumors were classified as more or less hypoxic according to the 6-gene hypoxia classifier (Fjeldbo et al, 2016)<sup>d</sup> Follow up time for patients with no events (recurrences) up to 60 months<sup>e</sup> Follow up data up to 60 months<sup>f</sup> Location of recurrence was unknown for three patients<sup>g</sup> Kruskal-Wallis-, Chi-square-, Fisher exact- or Mann-Whitney U-test were used where appropriate

\* How et al, 2014. Training cohort

**Supplementary Table S2.** miR-200a/b/-429 expression score *versus* clinical markers and hypoxia status for 200 patients.

| <b>Marker</b>                         | <b>Statistical test</b>  | <b>P-value</b>       |
|---------------------------------------|--------------------------|----------------------|
| FIGO stage (I,II,III,IV)              | Kruskal-Wallis test      | $4.2 \times 10^{-1}$ |
| Lymph node status (pos. vs neg.)      | Mann Whitney U-test      | $5.5 \times 10^{-1}$ |
| Tumor volume (mm <sup>3</sup> )       | Spearman rho correlation | $3.7 \times 10^{-1}$ |
| Hypoxia status (more vs less hypoxic) | Mann Whitney U-test      | $6.4 \times 10^{-1}$ |

**Supplementary Table S3.** Tumor growth delay (TDG) in miR-200a/b/-429-overexpressing xenografts after radiation treatment (RT)

| Group                        | Tumors (n) | V <sub>0</sub> (mm <sup>3</sup> ) <sup>a</sup><br>(mean±SEM) | T <sub>1.5x</sub><br>(mean±SEM) | TGD (days) <sup>b</sup><br>(mean±SEM) | P-value<br>TGD 1.5x <sup>c</sup> | Normalized<br>TGD (days) <sup>d</sup><br>(mean±SEM) | Enhancement<br>factor <sup>e</sup> |
|------------------------------|------------|--------------------------------------------------------------|---------------------------------|---------------------------------------|----------------------------------|-----------------------------------------------------|------------------------------------|
| Control <sup>f</sup>         | 3          | 200±19.2                                                     | 5.3±0.9                         | -                                     |                                  |                                                     |                                    |
| miR-200a/b/-429 <sup>f</sup> | 4          | 233±19.1                                                     | 3.7±0.2                         | - 1.6±0.2                             |                                  |                                                     |                                    |
| Control + RT                 | 8          | 210±11.3                                                     | 6.7±0.8                         | 1.4±0.8                               |                                  |                                                     |                                    |
| miR-200a/b/-429 + RT         | 10         | 230±11.7                                                     | 13.0±1.9                        | 7.7±1.9                               | 1.3x10 <sup>-2</sup>             | 9.4±1.9                                             | 6.6                                |

<sup>a</sup> V<sub>0</sub>, tumor volume at time of radiation (day 0)

<sup>b</sup> TGD = difference in T<sub>1.5x</sub> when compared to Control

<sup>c</sup> Students T-test, compared to Control + RT

<sup>d</sup> Normalized TGD = tumor growth delay in miR-200 + IR group minus TGD in miR-200 group

<sup>e</sup> Normalized TGD of miR-200a/b/-429 + RT group divided by TGD of Control + RT group

<sup>f</sup> Tumor growth data obtained from non-irradiated tumors in the xenograft characterization study. Tumors which matched the volume V<sub>0</sub> and following 1.5 x V<sub>0</sub> in the corresponding groups of RT-tumors (Control + RT and miR-200a/b/-429 + RT, respectively) were used to enable comparable growth data.
